# Supplementary material
Source: PubMed Central journal article supplement (PMC3276677)
Supplement: mmc1.pdf [file mmc1.pdf]

The American Journal of Human Genetics, Volume 90  
Supplemental Data

**X-linked Megalocornea Caused by Mutations in *CHRD1*  
Identifies an Essential Role for Ventroptin in Anterior  
Segment Development**

Tom R. Webb, Mar Matarin, Jessica C. Gardner, Dan Kelberman, Hala Hassan, Wei Ang, Michel Michaelides, Jonathan B. Ruddle, Craig E. Pennell, Seyhan Yazar, Chiea C. Khor, Tin Aung, Mahinda Yogarajah, Anthony G. Robson, Graham E. Holder, Michael E. Cheetham, Elias I. Traboulsi, Anthony T. Moore, Jane C. Sowden, Sanjay M. Sisodiya, David A. Mackey, Stephen J. Tuft, and Alison J. Hardcastle



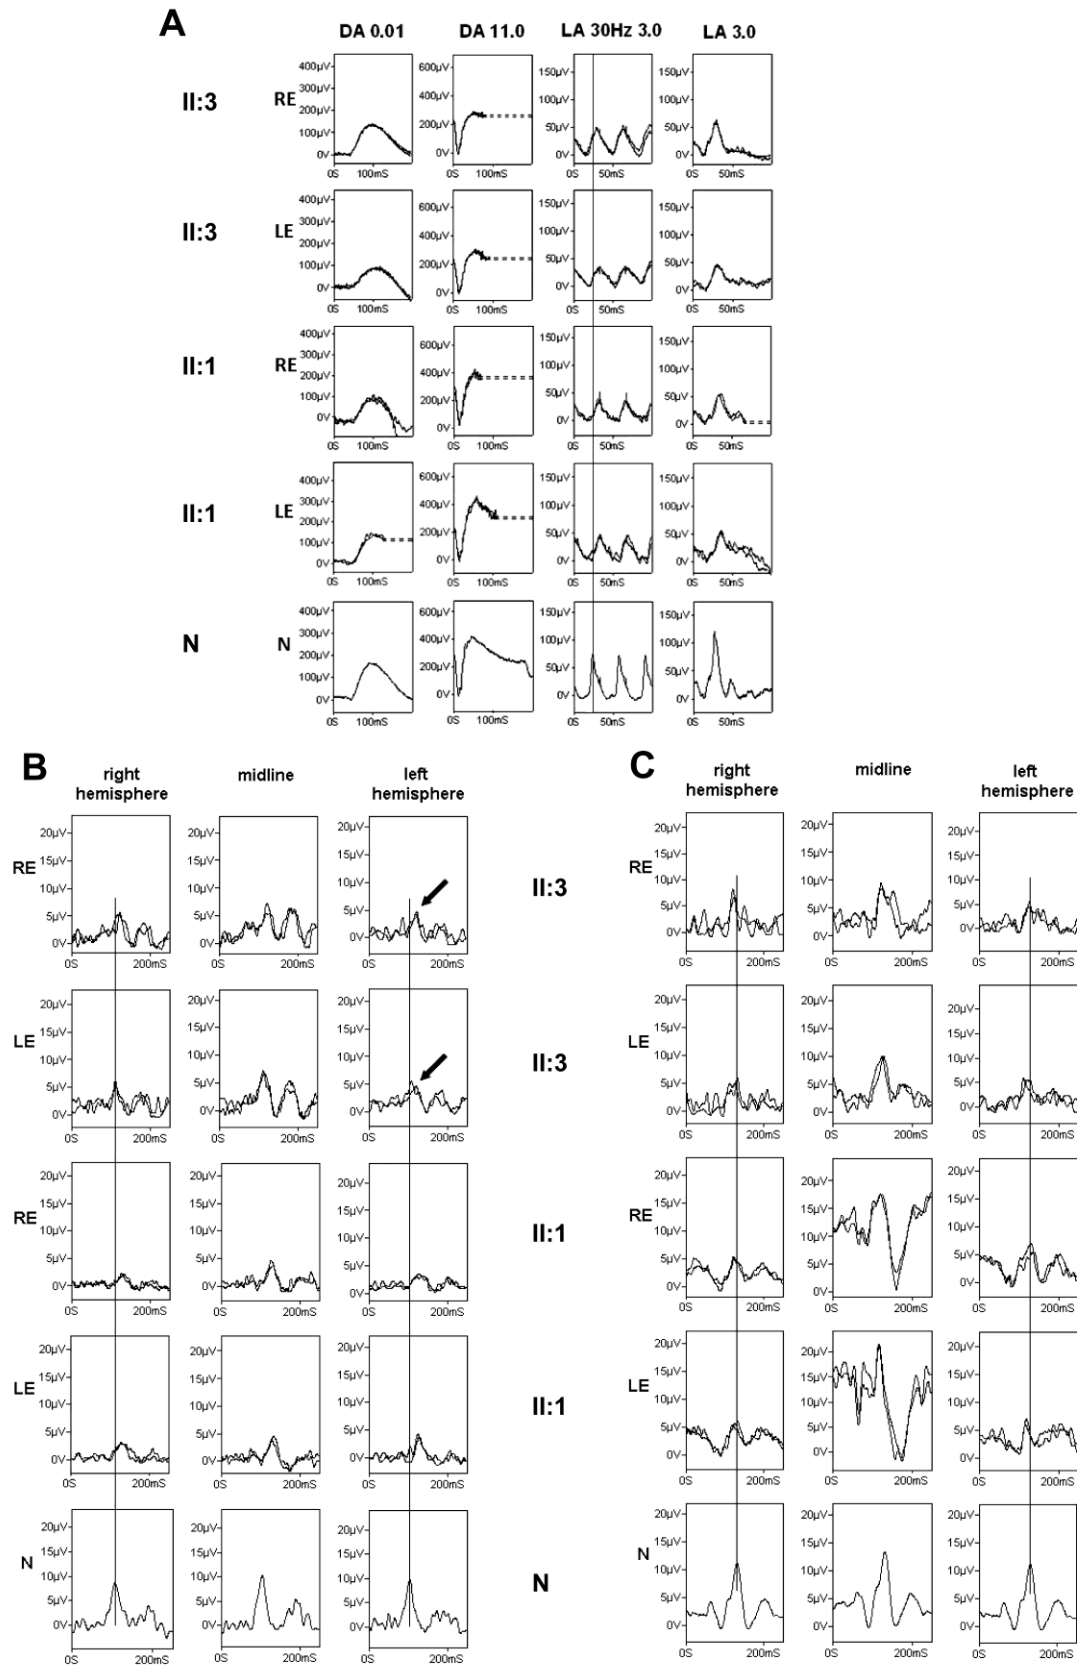

**Figure S2. Electrophysiology Showing Mild Generalised Cone System Dysfunction (Subjects II:1 and II:3) and Interhemispheric VEP Asymmetry (Subject II:3)**

(a) Full-field ERGs for patients II:3 and II:1. Dark-adapted (DA) ERGs are

shown for flash strengths of 0.01 and 11.0cd.s.m<sup>-2</sup> and show no definite evidence of rod system involvement; light adapted (LA; background 30cd.m<sup>-2</sup>) ERGs for flashes of 3.0cd.s.m<sup>-2</sup> (30 Hz and 2 Hz) are consistent with mild generalised cone system dysfunction in both individuals. Broken lines replace eye movement artifacts. **(b)** Pattern reversal VEPs for patients II:3 and II:1 were recorded to a high contrast black and white reversing checkerboard stimulus (2,2 reversals/second; check size 50 minutes of arc). Arrows indicate increased peak time in the left hemisphere traces for II:3 from both eyes. Delay in pattern reversal VEPs from both the right and left eyes of II:1, and right eye of II:3 compared to normal age-matched control is highlighted (line from normal trace). **(c)** Flash VEPs for II:1 and II:3 were considered normal. RE = right eye, LE = left eye, N = age-matched normal subject for comparison.

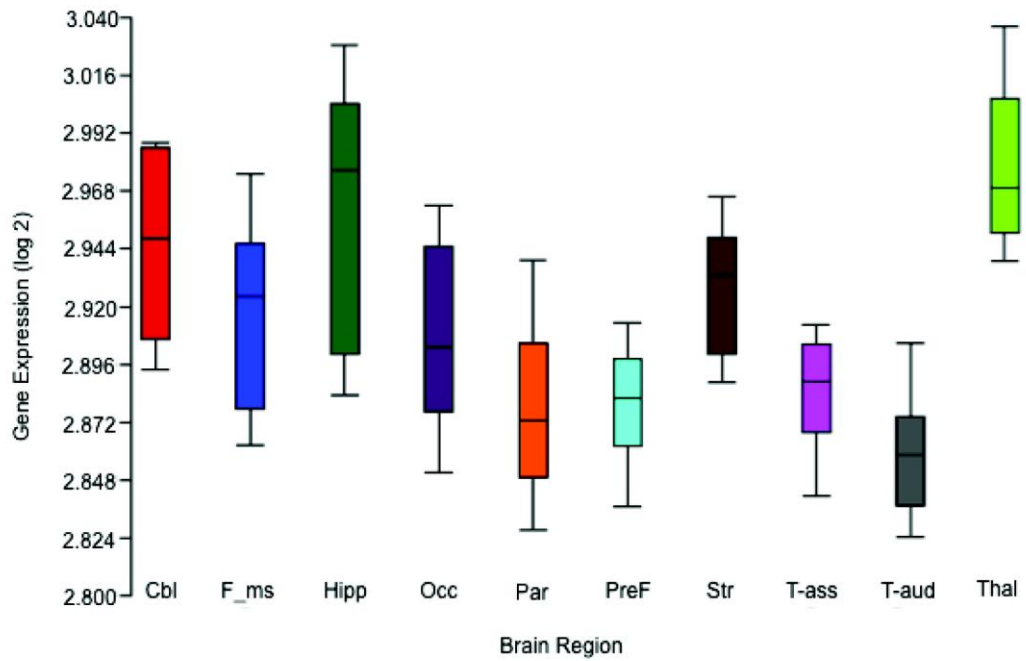

**Figure S3. Expression of *BMP4* in Human Fetal Brain Regions**

*BMP4* is expressed in all brain regions tested. Cbl: Cerebellum; F\_ms: Motor somatosensory neocortex; Hipp: Hippocampus; Occ: Occipital visual neocortex; Par: Parietal association neocortex; PreF: Prefrontal cortex (orbital dorsolateral, medial and ventrolateral prefrontal neocortex); Str: Striatum; T-ass: Temporal association neocortex; T-aud: Temporal auditory neocortex; Thal: Mediodorsal thalamus. Box plots represent median and 25–75th percentiles. Upper and lower lines show minimum and maximum values, respectively.

**Table S1. Summary of Mutations Identified in *CHRDL1* Causing X-Linked Megalocornea**

| Family | <i>CHRDL1</i> mutation                                        | Exon/Intron           | Predicted consequence                          |
|--------|---------------------------------------------------------------|-----------------------|------------------------------------------------|
| 1      | 238,024 bp deletion<br>ChrX:109726503<br>to<br>ChrX:109964527 | Delete exons 6-12     | truncated protein product                      |
| 2      | Frameshift<br>c.101delAG                                      | Exon 3                | p.Glu34AspfsX14<br>truncated protein product   |
| 3      | Missense<br>c.782G>T                                          | Exon 9                | p.Cys261Phe non-<br>functional chordin domain  |
| 4      | Splice site<br>IVS4+2T>G                                      | Intron 4              | miss-splicing and<br>truncated protein product |
| 5      | Frameshift<br>mutation<br>c.872delG                           | Exon 9                | p.Cys291LeufsX25<br>truncated protein product  |
| 6      | Nonsense<br>c.652C>T                                          | Exon 8                | p.Arg218X<br>truncated protein product         |
| 7      | Segmental<br>deletion >270 Kb                                 | Delete entire<br>gene | no protein                                     |

*Nomenclature based on Ensembl annotation transcript ID ENST00000372042, protein ID ENSP00000361112 and HG19 genome assembly*

**Table S2. Summary of Association Study for Mean Corneal Diameter and *CHRDL1* SNP Genotype**

| SNP        | Position  | Minor Allele | MAF  | Functional Category | Cohort           | p-value          |
|------------|-----------|--------------|------|---------------------|------------------|------------------|
| rs12857107 | 109813366 | G            | 0.40 | Intron              | Raine            | 0.8911           |
| rs5943057  | 109825861 | C            | 0.40 | Intron              | Raine            | 0.8911           |
| rs197023   | 109855043 | G            | 0.29 | Intron              | Raine<br>Chinese | 0.9490<br>0.6793 |
| rs12689346 | 109890618 | A            | 0.25 | Intron              | Raine            | 0.2176           |

**Table S3. Detail of Electrophysiology for Patients with Mild Generalised Cone System Dysfunction Compared to Controls**

|             | <b>II:3</b> |     |                |     | <b>II:1</b> |     |                |     | <b>Normal</b><br>(70-79 years, N=50) |                            |
|-------------|-------------|-----|----------------|-----|-------------|-----|----------------|-----|--------------------------------------|----------------------------|
|             | timing (ms) |     | amplitude (µV) |     | timing (ms) |     | amplitude (µV) |     | timing (ms)                          | amplitude (µV)             |
|             | RE          | LE  | RE             | LE  | RE          | LE  | RE             | LE  | 95 <sup>th</sup> percentile          | 5 <sup>th</sup> percentile |
| DA 0.01     | 97          | 105 | 145            | 110 | 98          | 100 | 125            | 140 | 111                                  | 100                        |
| DA 11.0     |             |     |                |     |             |     |                |     |                                      |                            |
| a-wave      | 14          | 14  | 240            | 225 | 14          | 13  | 255            | 240 | 14                                   | 187                        |
| b-wave      | 55          | 55  | 305            | 310 | 54          | 55  | 380            | 415 | 58                                   | 296                        |
| LA 3.0 30Hz | 30          | 33  | 45             | 35  | 32          | 32  | 40             | 40  | 30                                   | 55                         |
| LA 3.0 2Hz  |             |     |                |     |             |     |                |     |                                      |                            |
| a-wave      | 15          | 16  | 20             | 15  | 15          | 16  | 20             | 25  | 16                                   | 20                         |
| b-wave      | 29          | 29  | 60             | 50  | 34          | 34  | 55             | 60  | 32                                   | 85                         |

*Control data from Neveu MM et al. 2011*

**Table S4. Summary of Age–Corrected Cognitive Performance for MCG1 Individuals II:1 and II:3 from Family 1**

|                                | <b>Case</b>  |              |
|--------------------------------|--------------|--------------|
|                                | <b>II:1</b>  | <b>II:3</b>  |
| <b>Age</b>                     | 71           | 66           |
| <b>Verbal IQ</b>               | 125          | 116          |
| <b>Vocabulary (centile)</b>    | 55 (75th)    | 49 (63th)    |
| <b>Digit Span</b>              | 20 (95th)    | 19 (91st)    |
| <b>Similarities</b>            | 24 (95th)    | 22 (84th)    |
| <b>Verbal Learning Trials</b>  | 55 (75-90th) | 48 (50-75th) |
| <b>Verbal learning delay</b>   | 12 (75th)    | 13 (90th)    |
| <b>Verbal Recall Immediate</b> | 43 (90th)    | 42 (75-90th) |
| <b>Verbal Recall Delayed</b>   | 36 (75th)    | 46 (>90th)   |
| <b>Fluency phonemic "s"</b>    | 19 (>96th)   | 20 (>96th)   |
| <b>Fluency animals</b>         | 30 (90th)    | 24 (90th)    |
| <b>Hayling Test</b>            | Average      | Average      |
| <b>Cognitive estimates</b>     | 1 (90th)     | 0 (95th)     |

## **Supplemental Methods, Cognitive Tests**

### ***Intellectual Level***

The Vocabulary, Digit Span, and Similarities subtests from the WAIS-R were administered and the scores were pro-rated to obtain an estimate of VIQ (Spreen & Strauss, 1998).

### ***Executive Functions***

Verbal fluency: The subject had to produce as many words beginning with the letter S (phonemic fluency) and as many animal names (semantic fluency) both in a minute. Performance on fluency tests, particularly for the phonemic category (letter "s"), is a sensitive indicator of frontal lobe functioning (Henry & Crawford, 2004).

The Hayling Test: A response suppression task. The subject has to complete two series of 15 sentences each missing the last word. In the first section a sensible completion is required and in the second a nonsensical completion. The test yields two measures of mental processing speed and an error score for the second series. Performance on this measure has been shown to involve frontal brain regions in healthy individuals (Collette *et al.* 2001) and to be adversely affected by frontal lobe pathology (Burgess *et al.* 1997).

Cognitive estimates: This is a semantic reasoning task that requires the subject to provide a reasonable estimation to ten questions that have no exact answer, based on their available semantic knowledge. The questions are of the format 'How fast do race horses gallop?' Penalties are awarded for inaccurate responses and the higher the score the poorer the reasoning demonstrated. This test has been shown to be sensitive to frontal lobe pathology (Spreen & Strauss, 1998).

### ***Memory***

Verbal Recall: This was assessed using the Story Recall subtest from the Adult Memory and Information Processing Battery (AMIPB; Coughlan & Hollows, 1986). The subject is read a short story and then has to recall as many details as possible immediately following presentation and again following a delay of 30 minutes. Performance measures used were the immediate recall score and the % retained score (delayed recall/immediate recall x 100).

Verbal Learning: The List Learning test from the AMIPB was employed. The subject is presented with a list of 15 words on five occasions and following each presentation has to recall as many of the words as possible. A second list of words is then presented and following one attempt at recall is required to recall as many words from the first list (delayed recall). The total number of words remembered in the learning phase (verbal learning trails) and in the delayed recall condition (verbal learning delay) were recorded.

## **Supplementary References**

Burgess, P., *et al.* (1997). The Hayling Island and Brixton Test Manual. *Edmunds: Thames Valley Test Co.*

Collette, F., *et al.* (2001). The functional anatomy of inhibition processes investigated with the Hayling task. *Neuroimage* **14**, 258-267

Coughlan, A., and Hollows, S. (1986) The Adult Memory and Information Processing Battery. *Leeds: St James Hospital.*



Henry, J.D., and Crawford, J.R. (2004) A meta-analytic review of verbal fluency performance following focal cortical lesions. *Neuropsychology*. **18**, 284-295.

Neveu, M.M., Dangour, A., Allen, E., Robson, A.G., Bird, A.C., Uauy, R., and Holder, G.E. (2011). Electroretinogram measures in a septuagenarian population. *Doc. Ophthalmol.* **123**, 75-81.

Spreen, O., and Strauss, E. (1998). A compendium of neuropsychological tests: administration, norms and commentary. *New York: Oxford University Press* (1998).
